# Supplementary material for: Modeling the effect of age on quantiles of the incubation period distribution of COVID-19
Source: BMC Public Health. 2021 Sep 27;21:1762. doi: 10.1186/s12889-021-11761-1 (PMC8474900; doi:10.1186/s12889-021-11761-1)
Supplement: Supplementary file 1 — Additional file 1 1. Variables description Age: age of the confirmed case InDate: infection date OutDate: onset date InPeriod: incubation Period 2. Values of variables Age: the original age of the confirmed case InDate and OutDate: for convenience, the values of InDate and OutDate were represented as the number of days departing from December 31, 2019, on which WHO announced the disease COVID-19 have become a public health incident. For example, the date January 1, 2020 takes the value 1. Incubation Period: Onset date - Infection date + 1 [file 12889_2021_11761_MOESM1_ESM.xlsx]

## Sheet: Data
Age	InDate	OutDate	InPeriod
29	23	24	2
39	22	23	2
57	17	24	8
30	20	24	5
50	23	25	3
43	16	23	8
29	21	24	4
21	11	23	13
41	19	27	9
46	22	27	6
36	22	29	8
64	23	28	6
29	24	29	6
42	22	31	10
66	22	33	12
36	20	27	8
29	23	32	10
69	20	26	7
61	22	31	10
39	23	31	9
33	26	26	1
55	24	30	7
53	20	26	7
56	24	27	4
51	23	33	11
43	20	33	14
63	23	30	8
56	26	40	15
54	22	25	4
64	25	42	18
67	24	35	12
37	11	14	4
39	4	9	6
56	16	16	1
18	17	19	3
32	17	17	1
45	14	19	6
42	19	20	2
33	18	20	3
44	17	21	5
46	21	22	2
26	16	28	13
43	15	27	13
42	15	32	18
26	23	32	10
31	23	34	12
10	23	34	12
30	19	33	15
43	19	32	14
47	23	29	7
47	20	20	1
52	19	19	1
57	25	38	14
36	21	25	5
35	13	25	13
20	18	19	2
36	20	28	9
24	21	32	12
27	20	22	3
37	20	24	5
28	20	21	2
26	22	23	2
33	22	22	1
27	20	25	6
32	19	19	1
22	16	23	8
42	14	17	4
48	17	23	7
38	20	21	2
42	19	20	2
47	17	27	11
34	20	27	8
47	14	22	9
45	24	32	9
50	35	39	5
37	21	28	8
36	22	28	7
42	18	22	5
53	22	30	9
40	13	19	7
50	15	16	2
50	15	16	2
21	20	23	4
44	20	24	5
45	20	25	6
38	22	29	8
39	25	30	6
65	25	40	16
32	20	26	7
38	22	30	9
36	19	23	5
26	23	27	5
35	22	23	2
34	22	28	7
38	20	29	10
51	17	22	6
25	19	20	2
51	18	29	12
62	16	22	7
26	19	27	9
56	16	23	8
55	15	23	9
56	23	26	4
44	20	25	6
38	26	28	3
60	22	24	3
46	26	31	6
74	20	24	5
45	20	22	3
28	19	20	2
26	23	25	3
25	22	22	1
53	17	27	11
26	16	23	8
31	19	23	5
51	19	23	5
31	19	25	7
43	25	35	11
84	22	38	17
34	15	18	4
41	13	20	8
21	18	27	10
55	20	24	5
35	23	32	10
18	16	28	13
64	17	31	15
37	15	30	16
67	26	28	3
67	24	38	15
45	28	40	13
68	25	38	14
70	33	40	8
51	38	42	5
58	26	39	14
51	35	44	10
28	31	41	11
56	22	24	3
23	23	37	15
13	30	41	12
57	27	40	14
31	20	24	5
50	22	26	5
65	23	27	5
65	18	30	13
61	25	36	12
31	19	24	6
45	13	21	9
38	17	25	9
35	17	21	5
29	19	23	5
41	23	27	5
42	22	26	5
43	19	26	8
42	19	26	8
52	21	26	6
19	22	24	3
48	24	29	6
50	17	28	12
26	22	28	7
38	18	28	11
34	23	31	9
34	21	32	12
47	21	28	8
11	20	32	13
19	19	33	15
53	26	32	7
22	22	22	1
35	17	21	5
38	12	19	8
49	15	27	13
56	21	26	6
38	21	27	7
34	16	28	13
43	22	33	12
33	23	31	9
32	22	33	12
56	23	32	10
33	16	28	13
46	18	34	17
30	18	21	4
52	23	24	2
69	23	27	5
33	19	25	7
43	22	29	8
48	12	28	17
74	12	28	17
49	26	36	11
45	26	36	11
21	26	36	11
37	18	20	3
19	13	20	8
49	18	20	3
35	20	24	5
34	22	26	5
51	13	19	7
26	21	27	7
25	19	28	10
37	23	28	6
73	23	25	3
75	23	24	2
42	23	26	4
18	23	31	9
7	23	36	14
19	23	33	11
57	22	41	20
39	19	22	4
47	20	27	8
53	21	28	8
45	25	30	6
66	21	31	11
29	19	30	12
44	24	30	7
70	20	32	13
31	25	38	14
45	21	33	13
49	26	31	6
37	26	43	18
30	17	22	6
29	17	30	14
21	21	23	3
29	22	24	3
41	15	27	13
44	11	23	13
33	26	31	6
46	18	29	12
36	25	34	10
34	26	34	9
45	19	37	19
50	13	18	6
48	10	18	9
34	9	11	3
37	11	11	1
37	8	14	7
62	19	20	2
41	16	18	3
30	20	20	1
60	26	33	8
75	21	23	3
49	25	31	7
30	19	25	7
47	19	31	13
43	28	28	1
64	28	28	1
51	23	30	8
49	23	27	5
46	23	29	7
17	23	26	4
33	10	24	15
53	21	35	15
41	24	35	12
54	30	30	1
26	22	28	7
50	33	35	3
28	20	34	15
36	17	25	9
51	25	32	8
49	21	27	7
25	20	23	4
64	24	34	11
23	22	33	12
37	25	40	16
38	26	28	3
49	24	29	6
48	24	29	6
50	25	29	5
24	19	29	11
46	19	29	11
18	19	29	11
54	26	31	6
47	22	30	9
22	26	30	5
78	24	34	11
48	27	38	12
28	20	22	3
38	17	27	11
64	18	29	12
69	18	27	10
43	20	23	4
32	21	25	5
43	22	23	2
52	18	27	10
29	19	30	12
50	12	25	14
56	19	26	8
49	18	32	15
32	23	24	2
42	19	23	5
33	23	26	4
30	21	27	7
20	20	27	8
44	21	28	8
22	18	28	11
34	22	32	11
64	23	39	17
41	21	36	16
10	23	39	17
48	22	29	8
39	19	28	10
20	20	23	4
40	16	26	11
42	22	25	4
67	18	25	8
24	20	26	7
54	20	31	12
56	21	32	12
35	28	32	5
53	21	32	12
5	20	29	10
26	22	33	12
28	25	35	11
39	20	24	5
31	20	25	6
51	19	23	5
28	24	36	13
46	19	21	3
49	19	23	5
46	18	23	6
43	22	25	4
44	17	20	4
47	22	27	6
66	23	29	7
34	22	28	7
48	22	29	8
34	24	29	6
54	22	26	5
68	19	21	3
55	21	26	6
39	22	26	5
16	18	23	6
72	20	30	11
78	20	26	7
56	21	29	9
31	21	26	6
34	21	30	10
34	19	26	8
52	20	25	6
78	19	31	13
56	20	28	9
27	22	23	2
82	25	32	8
55	20	25	6
0.583	25	32	8
27	24	32	9
38	21	30	10
77	23	29	7
41	20	32	13
64	24	26	3
31	21	27	7
76	15	24	10
5	21	33	13
49	22	31	10
51	21	30	10
43	21	26	6
63	20	24	5
69	21	24	4
24	21	29	9
55	23	37	15
45	34	39	6
51	23	26	4
42	15	20	6
32	14	16	3
22	17	20	4
49	19	19	1
28	20	21	2
41	7	14	8
46	20	23	4
45	20	23	4
9	20	21	2
40	23	23	1
28	11	20	10
27	18	21	4
15	21	21	1
64	10	10	1
44	18	18	1
70	20	23	4
32	13	17	5
36	21	21	1
18	20	20	1
50	17	18	2
40	17	18	2
63	10	10	1
47	21	21	1
42	23	23	1
48	17	17	1
39	22	23	2
41	18	22	5
27	18	22	5
41	22	24	3
36	20	25	6
41	18	18	1
25	18	21	4
46	18	18	1
50	22	22	1
36	20	20	1
36	20	20	1
32	23	25	3
64	22	22	1
70	25	25	1
25	22	22	1
3	21	27	7
46	22	22	1
66	18	18	1
49	21	21	1
29	19	24	6
26	18	20	3
46	13	21	9
45	22	23	2
27	19	26	8
21	22	23	2
38	16	18	3
45	21	26	6
23	24	24	1
55	23	23	1
23	21	22	2
49	23	26	4
49	17	24	8
48	20	24	5
68	20	20	1
35	17	27	11
37	16	27	12
38	18	18	1
43	21	27	7
41	19	21	3
60	18	19	2
13	20	26	7
36	16	26	11
25	12	24	13
62	14	27	14
39	20	28	9
41	20	28	9
40	20	27	8
26	23	25	3
27	22	24	3
37	24	26	3
74	25	27	3
62	22	24	3
68	18	28	11
39	19	28	10
36	21	26	6
50	27	29	3
47	19	31	13
38	23	29	7
52	21	23	3
50	23	31	9
65	21	26	6
41	25	29	5
33	24	27	4
45	26	31	6
51	22	25	4
51	20	26	7
35	20	33	14
50	24	34	11
77	27	31	5
40	22	28	7
48	19	19	1
27	20	35	16
65	20	34	15
39	17	34	18
27	20	28	9
65	19	30	12
22	19	31	13
27	15	22	8
35	22	27	6
50	23	36	14
43	27	34	8
29	24	29	6
66	24	26	3
43	20	26	7
51	26	32	7
64	23	33	11
63	23	32	10
42	26	32	7
58	20	28	9
46	18	26	9
23	15	19	5
31	21	28	8
62	12	25	14
28	18	28	11
24	22	27	6
74	24	35	12
84	20	30	11
39	24	36	13
44	21	29	9
25	22	34	13
84	22	35	14
46	22	24	3
71	23	38	16
67	24	37	14
46	24	36	13
26	18	22	5
42	22	40	19
76	24	44	21
30	17	18	2
50	7	10	4
37	15	19	5
39	22	23	2
22	19	22	4
22	21	24	4
22	21	25	5
22	21	24	4
24	21	22	2
22	21	24	4
30	23	25	3
64	20	23	4
52	24	26	3
45	22	23	2
49	19	21	3
34	20	25	6
71	21	24	4
28	21	27	7
27	23	27	5
28	23	28	6
49	20	26	7
5	23	25	3
54	21	24	4
45	25	27	3
27	25	28	4
32	22	24	3
35	23	30	8
34	23	30	8
21	21	30	10
32	18	25	8
56	20	29	10
41	26	30	5
43	22	26	5
49	22	24	3
50	19	20	2
50	22	32	11
56	21	24	4
43	20	23	4
35	20	25	6
28	21	25	5
45	23	28	6
49	20	24	5
49	24	29	6
55	23	34	12
51	22	33	12
36	19	26	8
49	26	28	3
52	24	33	10
30	20	29	10
32	20	34	15
67	27	30	4
69	27	36	10
30	32	34	3
44	24	28	5
41	24	33	10
28	19	22	4
62	22	27	6
26	17	21	5
27	21	25	5
35	22	26	5
42	26	32	7
19	26	33	8
58	25	37	13
43	20	22	3
54	16	18	3
47	18	22	5
55	9	18	10
47	16	22	7
46	16	19	4
39	21	24	4
48	20	23	4
34	20	22	3
66	21	27	7
41	21	23	3
4	20	29	10
27	23	26	4
57	17	30	14
38	25	30	6
46	21	32	12
65	25	31	7
65	20	29	10
47	16	19	4
36	17	23	7
39	22	25	4
60	16	19	4
48	21	25	5
55	19	29	11
62	24	27	4
35	25	35	11
33	18	22	5
44	23	30	8
35	24	30	7
35	23	32	10
50	15	27	13
40	18	26	9
52	19	28	10
49	20	27	8
31	19	28	10
24	19	28	10
38	19	32	14
34	22	31	10
28	27	38	12
65	23	28	6
32	12	21	10
20	21	25	5
67	22	30	9
37	18	28	11
38	25	30	6
36	17	29	13
48	15	26	12
34	19	33	15
41	20	24	5
38	25	29	5
38	25	25	1
45	22	31	10
30	23	35	13
39	23	24	2
32	38	45	8
58	24	31	8
38	26	37	12
58	25	37	13
41	22	38	17
54	25	32	8
73	23	35	13
54	24	30	7
58	20	26	7
64	22	33	12
56	25	32	8
52	22	25	4
39	23	25	3
63	22	33	12
72	24	32	9
68	24	31	8
34	24	27	4
40	21	26	6
64	23	25	3
48	23	28	6
49	23	28	6
40	20	27	8
35	20	27	8
38	21	32	12
24	22	26	5
26	19	25	7
52	29	29	1
45	16	19	4
30	18	22	5
49	20	21	2
44	16	20	5
35	22	24	3
17	17	21	5
49	16	20	5
40	22	23	2
37	22	24	3
53	19	21	3
33	20	23	4
62	17	17	1
37	22	25	4
40	17	23	7
52	18	20	3
61	23	27	5
33	22	25	4
53	24	25	2
64	14	18	5
41	21	25	5
7	18	25	8
46	20	26	7
36	27	28	2
54	24	27	4
52	22	28	7
10	20	28	9
41	20	29	10
66	21	29	9
22	26	27	2
65	23	26	4
36	25	31	7
57	23	30	8
25	19	29	11
59	24	29	6
29	24	32	9
37	19	21	3
50	20	21	2
25	20	22	3
63	16	23	8
57	19	25	7
50	20	22	3
35	18	23	6
52	16	26	11
28	19	20	2
71	20	24	5
56	14	22	9
45	19	21	3
21	19	20	2
18	18	26	9
45	24	25	2
39	20	25	6
34	18	26	9
57	19	21	3
31	21	25	5
46	22	23	2
45	26	26	1
65	21	26	6
23	22	26	5
43	18	27	10
37	19	27	9
49	23	27	5
52	19	28	10
54	19	25	7
29	25	27	3
33	25	33	9
56	19	25	7
59	19	26	8
28	19	32	14
85	19	32	14
80	19	32	14
26	19	29	11
63	19	31	13
11	19	31	13
67	19	31	13
37	19	32	14
51	24	31	8
64	19	27	9
65	19	34	16
31	25	35	11
31	25	35	11
55	25	35	11
56	19	22	4
67	19	29	11
11	19	34	16
65	19	35	17
31	26	33	8
82	19	35	17
69	19	26	8
38	19	34	16
39	19	34	16
34	19	36	18
55	19	33	15
74	19	36	18
38	25	29	5
1	19	35	17
59	19	34	16
74	19	36	18
56	19	36	18
51	19	31	13
33	19	29	11
77	19	30	12
50	25	37	13
64	19	20	2
46	8	12	5
68	16	16	1
56	9	16	8
30	17	21	5
27	6	18	13
51	18	22	5
65	9	19	11
27	19	23	5
57	17	19	3
34	15	19	5
52	20	20	1
28	20	23	4
44	18	20	3
46	18	22	5
57	19	19	1
63	18	19	2
32	21	21	1
52	13	17	5
27	21	21	1
49	8	14	7
29	20	20	1
42	18	24	7
34	18	21	4
50	20	22	3
43	23	23	1
32	21	21	1
26	20	23	4
58	15	19	5
49	22	23	2
53	18	19	2
53	13	18	6
41	20	21	2
25	24	26	3
57	14	21	8
48	20	21	2
53	16	19	4
56	21	22	2
57	12	24	13
57	6	22	17
42	19	23	5
43	16	22	7
32	19	21	3
55	18	23	6
46	21	22	2
47	21	21	1
60	11	23	13
30	20	22	3
47	22	24	3
42	19	25	7
41	18	26	9
51	17	22	6
68	20	26	7
36	22	26	5
48	18	27	10
23	21	25	5
45	21	25	5
44	21	25	5
40	22	22	1
42	16	20	5
46	22	24	3
39	20	25	6
48	16	23	8
35	20	26	7
50	17	25	9
36	18	24	7
50	21	23	3
46	22	23	2
28	20	24	5
34	19	23	5
50	18	23	6
33	19	19	1
55	16	21	6
56	14	19	6
41	20	21	2
37	18	24	7
30	21	21	1
35	17	25	9
46	21	24	4
29	20	24	5
48	22	22	1
52	18	22	5
37	20	21	2
34	20	24	5
68	14	24	11
34	20	24	5
52	22	27	6
53	19	24	6
44	21	27	7
27	17	28	12
39	20	26	7
50	22	27	6
38	18	26	9
30	16	16	1
64	23	27	5
39	23	27	5
33	17	20	4
59	20	25	6
23	20	27	8
13	20	27	8
40	23	27	5
43	23	27	5
31	17	28	12
39	20	29	10
26	16	25	10
37	22	27	6
58	23	26	4
36	21	29	9
36	21	29	9
52	16	29	14
53	16	28	13
42	23	29	7
40	18	29	12
56	20	24	5
41	15	29	15
22	17	21	5
53	23	31	9
57	22	28	7
42	20	31	12
47	17	29	13
35	25	31	7
42	25	32	8
42	22	32	11
37	12	21	10
37	13	20	8
47	21	25	5
47	22	32	11
27	19	26	8
44	18	19	2
35	22	32	11
54	19	33	15
44	19	33	15
35	20	25	6
30	27	30	4
47	17	23	7
50	16	27	12
58	38	38	1
57	20	25	6
33	20	31	12
39	21	43	23
30	11	18	8
59	17	23	7
38	19	22	4
59	23	25	3
25	23	24	2
32	20	25	6
43	23	25	3
7	23	29	7
57	20	25	6
0.583	23	31	9
33	23	31	9
16	21	36	16
33	18	24	7
37	24	25	2
38	19	24	6
37	19	21	3
39	19	22	4
74	17	22	6
51	22	24	3
46	22	24	3
42	21	27	7
29	22	28	7
37	17	27	11
67	20	27	8
35	22	27	6
43	19	27	9
19	20	27	8
67	21	27	7
35	21	28	8
84	22	25	4
56	20	22	3
72	20	29	10
22	20	29	10
47	16	29	14
57	22	29	8
34	22	31	10
71	25	31	7
58	18	21	4
28	16	19	4
31	20	22	3
29	20	23	4
37	19	23	5
49	20	23	4
22	22	24	3
44	23	26	4
46	17	20	4
47	26	30	5
55	13	17	5
47	16	19	4
37	15	15	1
43	18	21	4
20	22	28	7
64	14	25	12
33	18	18	1
27	14	22	9
36	21	27	7
43	18	22	5
54	14	23	10
41	21	22	2
46	16	19	4
68	14	22	9
31	22	23	2
41	12	17	6
63	16	17	2
40	18	19	2
51	16	18	3
48	16	18	3
43	18	21	4
44	18	22	5
43	18	21	4
46	22	23	2
32	20	23	4
54	15	18	4
47	16	19	4
53	18	22	5
57	14	20	7
39	14	25	12
34	18	23	6
57	14	22	9
35	21	23	3
45	20	26	7
33	22	24	3
52	23	24	2
35	22	22	1
31	23	24	2
68	21	23	3
47	22	24	3
36	21	24	4
42	23	26	4
21	20	24	5
56	22	26	5
44	18	21	4
63	18	26	9
59	21	28	8
55	23	28	6
46	22	27	6
27	16	25	10
50	20	26	7
46	23	26	4
59	22	27	6
43	19	27	9
41	20	22	3
48	17	28	12
68	14	21	8
44	21	28	8
36	22	28	7
4	25	34	10
58	18	34	17
70	23	33	11
34	25	33	9
42	20	33	14
46	26	35	10
52	26	31	6
46	20	20	1
45	19	20	2
46	10	15	6
30	16	19	4
56	16	21	6
70	20	23	4
39	20	20	1
52	19	19	1
50	18	22	5
50	18	18	1
37	20	23	4
29	13	21	9
62	14	19	6
24	14	21	8
55	17	25	9
45	17	21	5
40	22	22	1
47	22	23	2
38	17	25	9
51	22	24	3
51	22	22	1
39	17	21	5
31	20	25	6
24	23	25	3
39	20	27	8
53	20	27	8
37	20	26	7
45	23	25	3
33	22	26	5
41	19	30	12
57	16	23	8
53	19	29	11
30	22	29	8
56	21	25	5
37	17	25	9
51	26	29	4
52	21	30	10
61	23	28	6
57	21	34	14
52	19	26	8
52	22	26	5
38	23	35	13
71	24	38	15
35	19	29	11
53	16	29	14
62	9	32	24
49	23	30	8
75	20	21	2
79	20	23	4
42	20	21	2
44	20	28	9
32	21	22	2
29	16	21	6
52	13	16	4
45	22	23	2
59	21	29	9
42	22	26	5
51	6	10	5
50	21	23	3
44	21	26	6
54	22	24	3
38	22	24	3
68	22	26	5
36	22	23	2
41	25	27	3
52	26	28	3
17	25	31	7
66	20	30	11
65	22	31	10
66	26	34	9
35	21	24	4
14	21	34	14
52	23	42	20
36	17	20	4
34	21	22	2
36	12	17	6
39	21	23	3
35	24	25	2
65	25	28	4
58	25	28	4
28	25	27	3
30	21	25	5
31	24	30	7
4	25	31	7
35	26	26	1
41	22	26	5
32	21	25	5
48	23	31	9
59	23	33	11
48	16	20	5
67	22	35	14
51	24	35	12
36	22	32	11
57	25	35	11
33	25	37	13
49	27	33	7
60	23	39	17
35	26	35	10
29	22	35	14
53	22	33	12
56	23	30	8
9	25	38	14
68	22	28	7
43	24	28	5
57	23	38	16
52	28	35	8
18	27	32	6
53	23	36	14
44	27	42	16
45	24	30	7
40	23	26	4
33	19	21	3
45	23	25	3
30	28	37	10
36	25	26	2
31	25	28	4
53	25	26	2
9	25	32	8
0.167	25	35	11
39	21	26	6
66	12	13	2
23	23	25	3
61	19	24	6
28	23	26	4
44	22	25	4
69	22	28	7
36	19	24	6
56	19	24	6
33	19	24	6
33	19	20	2
32	25	25	1
57	21	30	10
36	21	24	4
37	22	26	5
32	19	30	12
20	21	30	10
79	9	19	11
26	19	22	4
25	20	22	3
25	20	22	3
24	20	23	4
40	20	24	5
40	20	25	6
68	20	26	7
41	21	23	3
23	19	27	9
29	16	28	13
30	24	26	3
33	22	30	9
65	23	32	10
47	24	27	4
46	24	33	10
28	21	23	3
35	21	34	14
37	25	32	8
38	19	28	10
55	21	25	5
32	23	27	5
45	19	21	3
68	17	21	5
27	17	17	1
65	13	16	4
27	18	20	3
32	20	22	3
53	17	20	4
65	18	19	2
29	21	22	2
47	16	19	4
58	22	23	2
47	20	21	2
44	20	21	2
54	17	20	4
55	15	18	4
63	19	24	6
54	15	18	4
40	19	22	4
55	20	22	3
56	16	21	6
30	20	25	6
26	21	24	4
43	22	25	4
65	16	21	6
67	19	23	5
50	19	24	6
37	21	22	2
20	20	25	6
27	20	24	5
53	20	26	7
63	23	26	4
35	21	26	6
8	22	26	5
17	22	26	5
0.25	25	26	2
37	23	26	4
64	19	26	8
51	8	13	6
73	22	25	4
68	22	26	5
69	22	26	5
31	23	29	7
50	23	29	7
55	21	27	7
33	23	30	8
65	21	26	6
65	21	32	12
32	21	31	11
30	21	25	5
72	24	36	13
26	21	30	10
37	20	38	19
61	22	30	9
61	21	32	12
53	16	25	10
57	22	34	13
17	23	27	5
64	22	25	4
63	22	28	7
25	23	27	5
51	22	30	9
3	24	30	7
27	19	25	7
73	22	31	10
51	12	14	3
50	12	14	3
34	17	24	8
20	20	29	10
27	21	36	16
58	18	30	13
29	15	28	14
32	19	21	3
32	19	30	12
27	22	22	1
40	21	21	1
54	22	24	3
22	19	20	2
34	17	24	8
28	23	24	2
34	21	25	5
37	22	27	6
11	17	35	19
50	27	27	1
33	13	23	11
38	20	21	2
39	20	24	5
39	19	27	9
40	19	27	9
54	20	28	9
48	22	29	8
30	22	30	9
19	23	30	8
34	22	31	10
52	21	31	11
30	23	27	5
33	20	32	13
48	22	30	9
37	20	29	10
33	22	34	13
33	22	34	13
19	22	33	12
46	19	26	8
29	22	37	16
28	14	15	2
57	23	23	1
31	23	24	2
53	22	26	5
27	30	30	1
70	19	26	8
36	21	31	11
35	20	25	6
83	23	27	5
37	22	29	8
30	21	24	4
37	17	29	13
41	22	33	12
29	15	21	7
54	21	28	8
32	21	22	2
26	20	24	5
42	21	27	7
26	21	30	10
24	19	26	8
55	24	32	9
49	13	20	8
30	15	28	14
45	20	29	10
58	22	26	5
65	9	16	8
33	6	16	11
37	12	18	7
46	19	19	1
27	15	19	5
58	14	17	4
51	20	21	2
18	19	20	2
56	17	21	5
62	21	24	4
38	15	19	5
31	22	23	2
47	14	26	13
59	21	21	1
29	22	24	3
29	22	26	5
58	13	21	9
5	20	25	6
48	13	28	16
23	23	23	1
27	15	24	10
52	21	22	2
27	21	23	3
53	19	19	1
28	22	23	2
40	22	24	3
51	13	23	11
71	21	26	6
46	21	24	4
45	19	22	4
56	23	29	7
61	22	27	6
52	21	27	7
55	22	26	5
46	15	24	10
42	15	26	12
31	22	29	8
24	22	28	7
51	19	24	6
51	21	27	7
27	21	25	5
37	23	25	3
52	20	30	11
46	23	27	5
51	22	26	5
62	22	26	5
62	22	24	3
62	20	31	12
26	22	31	10
28	20	22	3
44	17	28	12
50	17	26	10
46	23	30	8
47	20	23	4
54	23	28	6
46	22	26	5
51	19	25	7
30	22	29	8
55	23	23	1
36	18	29	12
65	22	32	11
52	15	24	10
34	20	32	13
54	20	25	6
28	19	32	14
48	32	32	1
47	18	24	7
41	22	25	4
45	27	28	2
71	21	31	11
35	20	25	6
55	20	26	7
30	22	27	6
58	18	28	11
64	21	32	12
57	24	27	4
62	18	27	10
57	18	22	5
48	22	34	13
51	23	36	14
53	25	31	7
34	22	32	11
46	22	34	13
50	22	31	10
57	21	26	6
55	18	25	8
41	21	35	15
25	24	35	12
56	21	25	5
55	23	33	11
36	24	32	9
64	31	37	7
24	20	31	12
23	22	23	2
62	12	20	9
40	17	24	8
38	22	23	2
29	12	19	8
55	13	20	8
31	22	25	4
51	19	26	8
33	22	24	3
41	25	25	1
39	23	26	4
35	21	29	9
33	22	29	8
35	19	23	5
66	19	24	6
56	23	27	5
30	21	23	3
27	14	29	16
6	21	25	5
33	21	25	5
22	21	25	5
6	21	25	5
3	21	32	12
54	19	32	14
42	16	29	14
40	21	33	13
45	21	28	8
51	19	28	10
45	22	34	13
48	17	25	9
30	18	32	15
31	25	35	11
74	22	34	13
54	22	34	13
66	23	34	12
46	17	32	16
22	23	35	13
69	25	31	7
53	21	31	11
34	17	27	11
75	18	36	19
39	21	35	15
31	21	26	6
37	25	32	8
27	34	44	11
25	34	44	11
40	22	26	5
29	28	32	5
50	4	15	12
21	17	21	5
19	17	22	6
46	18	18	1
49	18	19	2
60	12	19	8
26	13	13	1
37	15	22	8
33	19	26	8
64	21	21	1
31	18	24	7
39	17	27	11
40	23	26	4
41	19	28	10
53	23	25	3
46	18	24	7
27	19	28	10
58	18	25	8
46	23	27	5
47	23	27	5
31	19	22	4
21	22	29	8
33	23	28	6
36	11	20	10
57	27	32	6
29	17	24	8
36	17	26	10
35	17	25	9
49	17	20	4
55	16	17	2
50	22	22	1
47	19	22	4
74	20	26	7
45	19	25	7
41	23	30	8
42	23	25	3
37	19	30	12
31	21	28	8
39	16	30	15
33	21	32	12
31	21	32	12
55	21	32	12
41	14	16	3
24	11	21	11
28	24	25	2
51	19	25	7
51	19	36	18
48	23	36	14
43	28	35	8
47	28	38	11
55	23	34	12
46	30	38	9
31	28	38	11
33	30	42	13
29	13	16	4
32	15	19	5
35	18	25	8
34	20	25	6
34	21	29	9
35	23	29	7
40	19	24	6
51	23	32	10
39	19	23	5
49	19	23	5
72	22	34	13
42	22	31	10
32	23	32	10
65	15	21	7
62	15	21	7
48	22	25	4
47	23	26	4
33	21	27	7
32	21	27	7
56	18	24	7
39	20	28	9
33	17	20	4
34	22	26	5
57	21	29	9
2	21	34	14
40	21	34	14
50	23	34	12
25	22	24	3
32	21	26	6
40	21	27	7
53	21	27	7
53	23	27	5
35	28	31	4
24	20	28	9
19	24	29	6
62	23	30	8
57	12	21	10
36	22	23	2
34	22	23	2
48	14	18	5
33	18	23	6
35	16	24	9
48	17	25	9
30	19	26	8
23	22	24	3
37	21	26	6
25	19	38	20
65	21	42	22
41	-2	13	16
55	-2	21	24
50	-2	16	19
45	25	36	12
7	25	39	15
61	25	39	15
64	21	41	21
64	18	41	24
41	22	23	2
40	22	27	6
16	22	27	6
53	21	30	10
53	23	33	11
23	21	34	14
63	26	41	16
33	31	42	12
38	36	42	7
27	20	24	5
30	12	21	10
47	21	22	2
26	23	25	3
23	20	21	2
62	21	24	4
27	25	28	4
36	19	20	2
57	19	21	3
49	19	22	4
62	20	22	3
56	28	34	7
10	24	36	13
3	22	35	14
35	22	25	4
33	22	25	4
26	22	28	7
27	22	25	4
26	19	21	3
37	22	22	1
27	21	21	1
23	22	23	2
26	21	23	3
37	23	24	2
34	23	24	2
30	22	23	2
11	23	26	4
9	23	29	7
75	12	22	11
66	12	24	13
44	17	23	7
41	17	26	10
28	16	21	6
35	27	27	1
30	26	27	2
33	24	28	5
40	21	27	7
2	27	30	4
69	27	31	5
34	27	31	5
46	26	28	3
12	26	28	3
17	26	28	3
52	15	27	13
46	21	24	4
73	19	29	11
30	25	30	6
63	21	29	9
52	26	27	2
36	27	30	4
40	20	33	14
73	20	33	14
47	10	22	13
37	17	27	11
79	23	30	8
35	23	32	10
35	23	33	11
14	21	34	14
34	24	31	8
25	25	29	5
56	24	34	11
29	14	27	14
46	16	26	11
30	38	44	7
40	38	44	7
32	27	34	8
37	28	39	12
36	28	34	7
63	2	8	7
71	12	15	4
62	15	20	6
63	21	21	1
74	13	18	6
36	18	19	2
73	19	20	2
42	17	18	2
57	18	19	2
46	18	21	4
66	17	20	4
64	17	22	6
20	12	17	6
49	15	21	7
21	19	22	4
75	18	19	2
47	22	22	1
78	19	23	5
54	18	20	3
67	21	22	2
41	22	22	1
40	21	22	2
64	19	21	3
7	17	24	8
69	18	21	4
55	21	22	2
52	22	23	2
69	22	23	2
47	15	18	4
62	21	23	3
22	19	22	4
20	19	20	2
51	20	20	1
66	16	19	4
19	20	21	2
64	22	24	3
38	24	24	1
66	19	24	6
29	20	23	4
35	23	25	3
51	20	23	4
51	13	20	8
52	13	21	9
32	16	20	5
30	21	22	2
50	20	23	4
78	20	23	4
32	21	22	2
26	18	21	4
39	19	26	8
52	22	23	2
59	23	23	1
53	12	19	8
46	11	12	2
56	21	23	3
65	22	23	2
38	22	24	3
52	18	23	6
64	22	24	3
40	22	24	3
56	23	23	1
67	23	23	1
35	22	23	2
36	22	24	3
61	22	24	3
60	21	24	4
64	17	18	2
39	18	20	3
73	17	20	4
35	22	26	5
57	18	19	2
86	23	25	3
66	20	23	4
37	21	26	6
65	22	26	5
6	17	26	10
39	23	24	2
47	22	23	2
56	21	26	6
59	23	26	4
57	23	24	2
66	22	23	2
78	16	26	11
61	21	22	2
54	23	25	3
55	23	24	2
57	23	26	4
76	15	27	13
38	23	27	5
33	24	28	5
49	23	25	3
18	23	25	3
56	22	26	5
38	18	24	7
32	22	25	4
68	22	24	3
62	6	15	10
48	18	24	7
46	18	21	4
60	23	25	3
14	23	27	5
62	20	24	5
43	25	27	3
70	20	25	6
38	21	21	1
41	19	23	5
45	25	30	6
60	20	29	10
20	22	29	8
81	15	22	8
49	22	28	7
65	22	24	3
60	24	28	5
56	23	26	4
29	21	28	8
29	23	29	7
41	19	26	8
37	22	28	7
31	25	25	1
62	23	26	4
58	23	28	6
34	17	27	11
61	22	22	1
35	25	27	3
66	11	28	18
31	25	26	2
48	19	25	7
62	23	27	5
33	21	24	4
55	25	28	4
25	22	25	4
62	20	30	11
60	20	30	11
32	24	30	7
6	24	30	7
53	24	24	1
9	19	29	11
5	23	27	5
28	18	24	7
56	21	22	2
36	23	26	4
33	23	25	3
57	18	29	12
60	22	31	10
45	21	30	10
17	21	28	8
67	20	24	5
40	20	29	10
50	18	25	8
50	18	31	14
37	19	26	8
12	25	32	8
8	19	32	14
7	20	31	12
43	20	27	8
53	19	28	10
13	20	30	11
33	21	30	10
66	19	31	13
36	18	27	10
31	21	30	10
40	20	30	11
31	20	27	8
65	22	30	9
46	19	27	9
50	16	22	7
38	24	27	4
46	18	29	12
67	19	26	8
48	19	22	4
18	21	27	7
45	23	29	7
28	18	27	10
71	20	25	6
44	20	30	11
47	17	20	4
20	20	32	13
59	18	28	11
45	20	26	7
28	19	22	4
58	21	30	10
30	20	29	10
36	23	32	10
37	23	32	10
7	23	33	11
28	18	30	13
26	21	32	12
60	23	26	4
61	23	32	10
42	22	33	12
58	22	32	11
20	10	16	7
38	22	31	10
23	9	25	17
57	18	28	11
63	15	26	12
50	20	27	8
49	20	27	8
34	17	28	12
2	20	34	15
2	25	36	12
38	20	21	2
46	23	26	4
33	22	35	14
65	25	36	12
66	25	36	12
5	25	29	5
36	25	34	10
66	23	35	13
2	24	36	13
54	23	35	13
34	26	34	9
53	22	26	5
43	24	32	9
7	25	37	13
64	21	30	10
65	21	38	18
62	21	36	16
56	23	25	3
54	19	34	16
36	22	27	6
25	27	35	9
3	25	36	12
39	23	25	3
30	22	34	13
49	24	29	6
69	18	21	4
18	13	23	11
32	26	36	11
36	24	32	9
61	21	24	4
62	24	38	15
41	11	23	13
50	29	39	11
13	29	39	11
35	23	24	2
28	25	39	15
40	22	37	16
33	27	36	10
69	24	40	17
28	25	39	15
31	25	34	10
53	23	32	10
52	21	35	15
41	24	33	10
59	22	32	11
54	24	41	18
53	17	27	11
57	24	35	12
26	25	27	3
51	39	43	5
32	26	44	19
37	24	40	17
33	24	45	22
59	22	43	22
44	25	44	20
65	43	45	3
51	25	27	3
69	20	40	21
54	21	35	15
27	21	40	20
46	23	36	14
47	20	40	21
52	23	35	13
51	22	25	4
45	23	41	19
48	15	22	8
50	23	29	7
27	18	30	13
25	25	30	6
51	26	34	9
48	22	29	8
25	20	33	14
22	26	39	14
56	25	39	15
46	26	32	7
58	31	35	5
45	29	29	1
62	17	22	6
36	17	22	6
24	20	22	3
24	18	27	10
40	18	26	9
35	23	26	4
34	19	26	8
45	19	29	11
62	19	29	11
48	21	25	5
34	34	36	3
48	22	24	3
31	26	32	7
46	22	22	1
43	22	23	2
32	22	22	1
54	19	25	7
37	17	21	5
39	22	26	5
31	22	26	5
53	21	24	4
63	21	29	9
46	21	25	5
65	22	26	5
39	25	31	7
45	21	29	9
25	17	18	2
57	17	23	7
44	20	25	6
64	20	29	10
30	23	24	2
45	25	29	5
35	19	21	3
47	19	22	4
20	22	25	4
18	19	25	7
34	19	27	9
35	25	35	11
30	26	37	12
25	18	25	8
31	22	30	9
31	22	30	9
57	8	10	3
49	25	29	5
51	13	20	8
55	18	22	5
42	17	23	7
88	15	24	10
40	24	31	8
7	18	28	11
67	22	25	4
32	23	27	5
20	23	27	5
40	24	33	10
35	25	32	8
51	26	38	13
68	24	37	14
68	25	47	23
51	9	20	12
42	20	22	3
48	16	27	12
32	14	17	4
33	23	25	3
28	20	30	11
70	20	32	13
37	27	34	8
23	23	28	6
59	16	24	9
33	16	24	9
47	21	26	6
41	14	25	12
43	19	28	10
42	19	28	10
51	22	32	11
30	33	45	13
45	24	27	4
43	24	38	15
63	19	24	6
19	19	31	13
34	26	38	13
70	15	33	19
44	24	36	13
46	28	39	12
20	20	31	12
49	24	31	8
59	19	19	1
66	24	26	3
26	21	21	1
55	22	29	8
43	22	24	3
36	22	24	3
33	22	24	3
29	23	38	16
29	23	35	13
43	18	37	20
50	18	29	12
30	20	24	5
15	24	37	14
51	20	31	12
29	19	25	7
26	23	32	10
43	20	30	11
41	20	28	9
31	20	26	7
31	20	23	4
2	20	31	12
61	19	29	11
33	23	29	7
26	19	29	11
63	21	28	8
39	15	23	9
58	19	23	5
65	20	22	3
64	23	25	3
33	22	26	5
28	18	24	7
[truncated: 173 more rows]

## Sheet: Links
List of links to official websites of the official websites of the health commission in 29 provinces outside the Hubei province of China
Shanghai	http://wsjkw.sh.gov.cn/
Tianjin	http://wsjk.tj.gov.cn/
Beijing	http://wjw.beijing.gov.cn/
Qinghai	https://wsjkw.qinghai.gov.cn/
Xining	http://www.xining.gov.cn
Xinjiang	http://wjw.xinjiang.gov.cn/
Gansu	http://wsjk.gansu.gov.cn/
Ningxia	http://wsjkw.nx.gov.cn/
Yinchuan	http://wjw.yinchuan.gov.cn
Jilin	http://wsjkw.jl.gov.cn/
Heilongjiang	http://wsjkw.hlj.gov.cn/
Shaanxi	http://sxwjw.shaanxi.gov.cn/
Shanxi	http://wjw.shanxi.gov.cn/
Jinzhong	http://wjw.sxjz.gov.cn/
Xiaxian	http://www.sxxiaxian.gov.cn/
Changzhi	http://www.wjw.changzhi.gov.cn/
Anhui	http://wjw.ah.gov.cn/
Hefei	http://www.hefei.gov.cn/
Huainan	http://wjw.huainan.gov.cn/
Maanshan	http://wjw.mas.gov.cn/
Bengbu	http://wjw.bengbu.gov.cn/, http://www.bbnews.cn/
Chuzhou	http://wjw.chuzhou.gov.cn/
Chizhou	http://wjw.chizhou.gov.cn/
Huaibei	http://wjw.huaibei.gov.cn/
Jiangsu	http://wjw.jiangsu.gov.cn/
Zhenjiang	http://wjw.zhenjiang.gov.cn/
Huaian	http://wjw.huaian.gov.cn/
Nantong	http://wjw.nantong.gov.cn/
Suzhou	http://wsjkw.suzhou.gov.cn/
Zhejiang	https://wsjkw.zj.gov.cn/
Hangzhou	http://wsjkw.hangzhou.gov.cn/
Ningbo	http://wjw.ningbo.gov.cn/
Wenzhou	http://wjw.wenzhou.gov.cn/
Shaoxing	http://sxws.sx.gov.cn/
Huzhou	http://www.huzhou.gov.cn/
Jiaxing	http://wsjkw.jiaxing.gov.cn/
Taizhou	http://wsjkw.zjtz.gov.cn/
Lishui	http://wsjsw.lishui.gov.cn/
Hunan	http://wjw.hunan.gov.cn/
Changde	http://wjw.changde.gov.cn/
Hengyang	http://wjw.hengyang.gov.cn/
Changsha	http://wsjkw.changsha.gov.cn/
Yueyang	http://wsj.yueyang.gov.cn/
Chenzhou	http://xycz.czs.gov.cn/
Loudi	http://wjw.hnloudi.gov.cn/
Shaoyang	https://wjw.shaoyang.gov.cn/
Guangdong	http://wsjkw.gd.gov.cn/
Zhaoqing	http://wjj.zhaoqing.gov.cn/
Jiangmen	http://www.jiangmen.gov.cn/
Hainan	http://wst.hainan.gov.cn/swjw/
Yunnan	http://ynswsjkw.yn.gov.cn/web/index
Guizhou	http://www.gzhfpc.gov.cn/
Guiyang	http://www.gzhfpc.gov.cn/
Zunyi	http://wsjkj.zunyi.gov.cn/
Fujian	http://wjw.fujian.gov.cn/
Xiamen	https://hfpc.xm.gov.cn/
Quanzhou	http://health.quanzhou.gov.cn/
Guangxi	http://wsjkw.gxzf.gov.cn/
Nanning	http://wjw.nanning.gov.cn/
Liuzhou	http://wjw.liuzhou.gov.cn/
Hechi	http://wjw.hechi.gov.cn/
Guilin	http://wjw.guilin.gov.cn/
Beihai	http://xxgk.beihai.gov.cn/
Hebei	http://wsjkw.hebei.gov.cn/
Sichuan	http://wsjkw.sc.gov.cn/
Suining	http://swjw.suining.gov.cn/
Neijiang	http://wsj.neijiang.gov.cn/
Ziyang	http://swjw.ziyang.gov.cn/
Chongqing	http://wsjkw.cq.gov.cn/
Henan	http://wsjkw.henan.gov.cn/
Luohe	http://www.lhswjw.gov.cn/
Nanyang	http://nyws.nanyang.gov.cn/
Shangqiu	http://www.shangqiu.gov.cn/
Shandong	http://wsjkw.shandong.gov.cn/
Qingdao	http://wsjkw.qingdao.gov.cn/
Jinan	http://jnmhc.jinan.gov.cn/
Linyi	http://wsjsw.linyi.gov.cn/
Liaocheng	http://wjw.liaocheng.gov.cn/
Jining	http://wjw.jining.gov.cn/
Weifang	http://wsjkw.weifang.gov.cn/
Weihai	http://wsjkw.weihai.gov.cn/
Rizhao	http://wsjkw.rizhao.gov.cn/
Zibo	http://ws.zibo.gov.cn/
Zaozhuang	http://wsjkw.zaozhuang.gov.cn/
Taian	http://wjw.taian.gov.cn/
Heze	http://hzswsjkw.heze.gov.cn/
Binzhou	http://wjw.binzhou.gov.cn/
Jiangxi	http://hc.jiangxi.gov.cn/
Shangrao	http://www.srswjw.gov.cn/
Fuzhou	http://wjw.jxfz.gov.cn/
Pingxiang	http://wjw.pingxiang.gov.cn/
Ganzhou	http://wjw.ganzhou.gov.cn/
Neimenggu	http://wjw.nmg.gov.cn/
Liaoning	http://wsjk.ln.gov.cn/
Dalian	http://hcod.dl.gov.cn/
Shenyang	http://www.shenyang.gov.cn/
Jinzhou	http://www.jz.gov.cn/
