# Supplementary material for: Modeling the effect of age on quantiles of the incubation period distribution of COVID-19
Source: BMC Public Health. 2021 Sep 27;21:1762. doi: 10.1186/s12889-021-11761-1 (PMC8474900; doi:10.1186/s12889-021-11761-1)
Supplement: Supplementary file 2 — Additional file 2 1. Data file path To ensure that the program runs successfully, the data file “Additional file 1.xls” should be placed in the current working directory of R, which can be shown by running the code “getwd()” in R. An alternative way is adding the file path in Line 18 of the code. 2. R packages needed R packages including “readxl” “splines” “ggplot2” “quantreg” and “SparseM” should be successfully installed before running the program. All the packages can be installed by running “install.packages()”, such as “install.packages(“readxl”)” for package “readxl”. [file 12889_2021_11761_MOESM2_ESM.r]

#-----------------------------------------------------------------------------#
# Code for "CQCoVID19"
# Author(s): Liu, Wang, Ma, Wang
# 2020\4\3
#-----------------------------------------------------------------------------#

library(readxl)
library(splines)
library(ggplot2)
library(quantreg)
library(SparseM)


#-----------------------------------------------------------------------#
# load data 
#-----------------------------------------------------------------------#
data = read_excel("Additional file 1.xlsx", sheet=1, na="NA")

Age      = as.numeric(data$Age)
InDate   = as.numeric(data$InDate)
OutDate   = as.numeric(data$OutDate)
InPeriod = as.numeric(data$InPeriod)


#--------------------------------------------------------------------------------#
# Plot Figure 1 -- scatter plot of Incubation period vs. Age
#--------------------------------------------------------------------------------#
plot(Age, InPeriod, xlab = "Age", ylab = "Incubation period")


#--------------------------------------------------------------------------------#
# Plot Figure 2 -- histogram
#--------------------------------------------------------------------------------#

#the estimator -- normal distribution of ages
logFunC = function(paramters, Age){
  mean = paramters[1]
  sd = paramters[2]
  dens = dnorm(Age, mean, sd)
  dens[dens < 1e-12] = 1e-12
  loglk = -sum(log(dens))
  return(loglk)
}
OFunC = function(paramters){ # objective function
  Qval = logFunC(paramters, Age)
  return(Qval)
}
estimatorC = nlminb(c(1, 1), OFunC, lower = c(-Inf, 1e-20))$par
mean = estimatorC[1]
sd = estimatorC[2]
#plot histogram
hist(Age, probability = T, ylim = c(0,0.030), main = "" )
age = sort(unique(Age))
lines(dnorm(age, mean, sd), col =2, lwd = 3)


#--------------------------------------------------------------------------------#
# Plot Figure 3 -- scatter plot of Number of infected cases vs. Infected time
#--------------------------------------------------------------------------------#

years = seq(min(InDate),max(InDate))
InDate1 = rep(NA, 46)
for (ii in 1 :46) {
  InDate1[ii] = length( as.numeric(data$InDate[data$InDate >= ii-3 &data$InDate< ii-2]))
}  #counting number infected cases of day
plot(years, InDate1, col="red",xlab = "Infected time",ylab = "Number of infected cases")
c = cbind(years, InDate1)
sy.hat <- smooth.spline(c,df = 15)    #using spine 
lines(sy.hat, col = 'SlateGrey',lty = 1, lwd = 2)


#--------------------------------------------------------------------------------#
# Table 1 -- parameter estimator
#--------------------------------------------------------------------------------#

tstar = max(OutDate) + 1
# initial function
InitFun = function(Ages, InPeriod){
  # eta  = theta[1], beta = theta[-1]
  logF0 = function(theta, Ages, InPeriod){
    dens = dweibull(InPeriod, theta[1], Ages %*% theta[-1])
    dens[dens < 1e-14] = 1e-14
    return(-mean(log(dens)))
  } 
  OFun0 = function(theta){return(logF0(theta, Ages, InPeriod))}
  
  # initial value
  init0 = constrOptim(c(1, 1, rep(0, ncol(Ages) - 1)), OFun0, NULL, 
                      ui = rbind(c(1, rep(0, ncol(Ages))), cbind(0, Ages)),
                      ci= rep(1e-14, 1 + nrow(Ages)))$par
  return(init0)
}
# the negtive log-likelihood function
logFun = function(theta, tstar, tvec, X, Yvec, Uvec, thetak){
  print(theta)
  Delta = tstar - tvec
  eta =  theta[1]
  beta = theta[-1]
  lambda = X %*% beta
  dens = dweibull(Yvec, eta, lambda)
  dens[dens < 1e-14] = 1e-14
  GDelta = pweibull(Delta, eta, lambda)
  
  part1 = mean(GDelta * log(dens))
  
  lambda1 = lambda
  lambda1[lambda1 < 1e-14] = 1e-14
  part2 = mean((log(eta) - eta * log(lambda1)) * (1 - GDelta))
  
  DLamb = (Delta / lambda)^eta
  part3 = -mean((DLamb + 1) * exp(-DLamb))
  
  etak = thetak[1]
  betak = thetak[-1]
  lambdak = X %*% betak

  pp = pweibull(Delta, etak, lambdak)
  xk = qweibull(Uvec, etak, lambdak)
  xk[xk > 1e14] = 1e14
  logg = log(xk)
  
  n = length(Yvec)
  intlog = numeric(n)
  for(ii in 1:n){
    if(length(logg[Uvec >= pp[ii]])){
      intlog[ii] = (1 - pp[ii]) * mean(logg[Uvec >= pp[ii]])
    }else{
      intlog[ii] = 0
    }
  }
  part4 = (eta - 1) * mean(intlog)
  
  fval = -(part1 + part2 + part3 + part4)
  return(fval)
}

# the estimator -- EM Algorithm
EMfun = function(init0, tstar, InDate, X, InPeriod, m = 1000, maxit = 20){
  minD = min(tstar - InDate)
  thetak = init0
  etak = thetak[1]
  betak = thetak[-1]
  n = length(InDate)
  lamdbak = X %*% betak
  
  is.cont = TRUE
  kk = 1
  while(is.cont & (kk < maxit)){
    # E-step
    pmin = min(pweibull(minD, etak, lamdbak))
    Uvec = runif(m, pmin, 0.999999)
    OFunE = function(theta){
      loglkE = logFun(theta, tstar, InDate, X, InPeriod, Uvec, thetak)
      return(loglkE)
    }
    
    # M-step
    thetaup = constrOptim(thetak, OFunE, NULL, 
                          ui = rbind(c(1, rep(0, ncol(X))), cbind(0, X)),
                          ci= rep(1e-5, 1 + nrow(X)))$par
    
    # check whether or not continue
    if(sum(abs(thetaup - thetak)) < n^(-0.51)){is.cont = FALSE}
    thetak = thetaup
    kk = kk + 1
    print(thetaup)
  }
  return(thetaup)
}
X = cbind(1, Age, Age^2, Age^3)
set.seed(666)
init0 = InitFun(X, InPeriod)
theta = EMfun(init0, tstar, InDate, X, InPeriod, m = 1000, maxit = 20)
eta = theta[1]
beta = theta[-1]


#--------------------------------------------------------------------------------#
# Plot Figure 4 -- conditional quantiles
#--------------------------------------------------------------------------------#

# compute quantiles
qumat = function(quantiles = c(0.05, 0.25, 0.5, 0.75, 0.90, 0.95), x,eta, beta){
  r = length(quantiles)
  c = nrow(x)
  lambda = x %*% beta
  quantilematrix = matrix(NA, ncol = c, nrow = r)
  for (a in 1:c) {
    quantilematrix[,a] = as.matrix(qweibull(quantiles, eta, lambda[a]))
  }
  return(quantilematrix)
}
# plot conditional quantiles 
plotqs = function(quantilematrix, quantiles = c(0.05, 0.25, 0.5, 0.75, 0.90, 0.95), 
                  x, ym, tb, ty = 1, wd =2, ex = 0.3, points = T, text = T, add = F,
                  color = c("blue","orange","red", "orange", "darkgreen", "blue"))
{
  r = nrow(quantilematrix)
  if(!add){
    plot(age,quantilematrix[1,], ylim = c(0,ym), ylab = 'Incubation period',
         xlab = 'Age', type = 'l', col = "white")
  }
  for (ii in 1:r) {
    lines(age,quantilematrix[ii,], type = 'l', lty = ty, lwd = wd, col = color[ii])
    if(points){
      points(age, quantilematrix[ii,], col = color[ii], pch = 20, cex = ex)
    }
    if(text){
      sca = quantilematrix[, tb] - 1
      text(tb, sca[ii], quantiles[ii], col = color[ii])
    }
  }
}

# plot quantiles
age = sort(unique(Age))

x = cbind(1, age, age^2, age^3)

quantilemat = qumat(quantiles = c(0.05, 0.25, 0.5, 0.75, 0.90, 0.95),x = x, eta = eta, beta = beta)
range(quantilemat)

plot(Age, InPeriod, col = 'grey90', cex = 0.8, ylab = "Incubation period")

plotqs(quantilematrix = quantilemat, x = x, ym = max(quantilemat), 
       tb = 88, wd = 3, ex = 1, points = F, add = T)

abline(h = 15.05, col = "SlateGrey", lty = 2, lwd = 2)
text(33, 16, 15.05, col = "SlateGrey")


#--------------------------------------------------------------------------------#
# Plot Figure 5 -- left
#--------------------------------------------------------------------------------#

# choose seperate points and split data accordingly
dataA = data.frame(Age, InDate, OutDate, InPeriod)
data1 = subset(dataA, Age <= 25)
data2 = subset(dataA, Age > 25 & Age<=60)
data3 = subset(dataA, Age> 60)

# estimate parameters under no covariant
InitFunA = function(Y){
  logF0 = function(theta, Y){
    dens = dweibull(Y, theta[1], theta[2])
    dens[dens < 1e-12] = 1e-12
    return(- mean(log(dens)))
  } 
  OFun0 = function(lambda){return(logF0(lambda, Y))}
  return(nlminb(c(1, 1), OFun0, lower = c(1e-12, 1e-12))$par)
}
logFunA = function(theta, tstar, tvec, Yvec, Uvec, thetak){
  eta = theta[1]
  lambda = theta[2]
  
  Delta = tstar - tvec
  dens = dweibull(Yvec, eta, lambda)
  dens[dens < 1e-14] = 1e-14
  GDelta = pweibull(Delta, eta, lambda)
  
  part1 = mean(GDelta * log(dens))
  if(lambda < 1e-14){
    part2 = (log(eta) - eta * log(1e-14)) * 
      (1 - mean(GDelta))
  }
  else{
    part2 = (log(eta) - eta * log(lambda)) * 
      (1 - mean(GDelta))
  }
  
  DLamb = (Delta / lambda)^eta
  part3 = -mean((DLamb + 1) * exp(-DLamb))
  
  pp = pweibull(Delta, thetak[1], thetak[2])
  xk = qweibull(Uvec, thetak[1], thetak[2])
  xk[xk > 1e14] = 1e14
  logg = log(xk)
  
  n = length(Yvec)
  intlog = numeric(n)
  for(ii in 1:n){
    if(length(logg[Uvec >= pp[ii]])){
      intlog[ii] = (1 - pp[ii]) * mean(logg[Uvec >= pp[ii]])
    }else{
      intlog[ii] = 0
    }
  }
  part4 = (eta - 1) * mean(intlog)
  
  fval = -(part1 + part2 + part3 + part4)
  print(c(eta,lambda,fval))
  return(fval)
}

EMfunA = function(init0, tstar, InDate, InPeriod, m = 1000, maxit = 20){
  minD = min(tstar - InDate)
  thetak = init0
  n = length(InDate)
  is.cont = TRUE
  kk = 1
  while(is.cont & (kk < maxit)){
    # E-step
    pmin = pweibull(minD, thetak[1], thetak[2])
    Uvec = runif(m, pmin, 0.999999)
    OFunE = function(theta){
      loglkE = logFunA(theta, tstar, InDate, InPeriod, Uvec, thetak)
      return(loglkE)
    }
    
    # M-step
    thetaup = nlminb(thetak, OFunE, lower = c(1e-12, 1e-12))$par
    
    # check whether or not continue
    if(sum(abs(thetaup - thetak)) < n^(-0.51)){is.cont = FALSE}
    thetak = thetaup
    kk = kk + 1
    print(thetaup)
  }
  return(thetaup)
}

set.seed(666)
init01 = InitFunA(data1$InPeriod)
init02 = InitFunA(data2$InPeriod)
init03 = InitFunA(data3$InPeriod)

estimator1 = EMfunA(init01, max(data1$OutDate)+1, data1$InDate, data1$InPeriod)
estimator2 = EMfunA(init02, max(data2$OutDate)+1, data2$InDate, data2$InPeriod)
estimator3 = EMfunA(init03, max(data3$OutDate)+1, data3$InDate, data3$InPeriod)


#
x = seq(0, 25, length.out = 10000)
# compute density
y1 = dweibull(x, estimator1[1], estimator1[2])
y2 = dweibull(x, estimator2[1], estimator2[2])
y3 = dweibull(x, estimator3[1], estimator3[2])

h1 = hist(data1$InPeriod, 
          freq=FALSE, 
          breaks=12, 
          xlab="Incubation Period", ylim = c(0.0,0.12),
          main="")  
h2 = hist(data2$InPeriod, 
          freq=FALSE, 
          breaks=12, 
          xlab="Incubation Period", ylim = c(0.0,0.12),
          main="")
h3 = hist(data3$InPeriod, 
          freq=FALSE, 
          breaks=12, 
          xlab="Incubation Period", ylim = c(0.0,0.12),
          main="")
plot(h1, col=rgb(0.8,0.8,0.8), xlim=c(0,max(data$InPeriod)),ylim = c(0.0,0.12),freq=FALSE, xlab = "Incubation Period", main="")  # first histogram
plot(h2, col=rgb(0.9,0.9,0.9), xlim=c(0,max(data$InPeriod)),ylim = c(0.0,0.12),freq=FALSE, xlab = "Incubation Period", add=T, main="")  # second
plot(h3, col=rgb(1,1,1), xlim=c(0,max(data$InPeriod)),ylim = c(0.0,0.12),freq=FALSE, xlab = "Incubation Period", add=T, main="")


x1 = seq(0, max(data1$InPeriod), 0.01)
x2 = seq(0, max(data2$InPeriod), 0.01)
x3 = seq(0, max(data3$InPeriod), 0.01)
lines(x1,dweibull(x1,estimator1[1],estimator1[2]),type = "l",lwd=3,lty=4,col="blue", ylim=c(0,1), main="")
lines(x2,dweibull(x2,estimator2[1],estimator2[2]),type = "l",lwd=2,lty=1,col="darkgreen", ylim=c(0,1), main="")
lines(x3,dweibull(x3,estimator3[1],estimator3[2]),type = "l",lwd=3,lty=5,col="red", ylim=c(0,1), main="")
words=c("0-25","26-60","over 60")
colors=c("blue","darkgreen","red")
line=c(4,1,5)
width=c(3,2,3)
legend("topright",legend = words,text.width = 3.5, col = colors, lty = line, lwd = width, cex = 1)


#--------------------------------------------------------------------------------#
# Plot Figure 5 -- right
#--------------------------------------------------------------------------------#
a = 25; b = 60
x = seq(0, 25, length.out = 10000)
# compute probability
y11 = pweibull(x, estimator1[1], estimator1[2])
y22 = pweibull(x, estimator2[1], estimator2[2])
y33 = pweibull(x, estimator3[1], estimator3[2])

# compute 0.95quantiles
q11 = qweibull(0.95, estimator1[1], estimator1[2])
q22 = qweibull(0.95, estimator2[1], estimator2[2])
q33 = qweibull(0.95, estimator3[1], estimator3[2])


# plot distribution and 0.95 quantiles
plot(x, y11, type = 'l', lwd = 3, col = "blue", lty = 4, xlab = "Incubation Period", ylab = "Cumulative distribution")
lines(x, y22, type = 'l', lwd = 2, col = "darkgreen", lty = 1)
lines(x, y33, type = 'l', lwd = 3, col = "red", lty = 5)
abline(h = 0.95, lty = 2, col = "SlateGrey")
abline(v = q11, lty = 2, col = "blue")
abline(v = q22, lty = 2, col = "darkgreen")
abline(v = q33, lty = 2, col = "red")
axis(1, at = q22, label = round(q22,1), cex.axis = 0.7, col.ticks = 'darkgreen', col.axis = 'darkgreen')
axis(1, at = q33, label = round(q33,1), cex.axis = 0.7, col.ticks = 'red', col.axis = 'red')
legend("left",legend = c(paste("0 -", a), paste(a + 1,"-",b), paste("over", b)), lwd = c(3, 2, 3),
       lty = c(4, 1, 5), col = c("blue", "darkgreen", "red"), cex = 1, text.width = 3.5)


#--------------------------------------------------------------------------------#
# Plot Figure 6 --  quantile regression
#--------------------------------------------------------------------------------#
x1 = Age
x2 = Age^2
x3 = Age^3
xy = data.frame(x1 = Age, x2 = Age^2, x3 = Age^3, y = InPeriod)
fit1 <- rq(InPeriod ~ x1 + x2 + x3, data = xy, tau=.05)
fit2 <- rq(InPeriod ~ x1 + x2 + x3, data = xy, tau=.25)
fit3 <- rq(InPeriod ~ x1 + x2 + x3, data = xy, tau=.50)
fit4 <- rq(InPeriod ~ x1 + x2 + x3, data = xy, tau=.75)
fit5 <- rq(InPeriod ~ x1 + x2 + x3, data = xy, tau=.95)
fit6 <- rq(InPeriod ~ x1 + x2 + x3, data = xy, tau=.90)
xx = seq(from = min(Age), to = max(Age), by = 0.001)
y1=cbind(xx, fit1$coefficients[1] + fit1$coefficients[2] * xx 
         + fit1$coefficients[3] * xx^2 + fit1$coefficients[4] * xx^3)
y2=cbind(xx, fit2$coefficients[1] + fit2$coefficients[2] * xx 
         + fit2$coefficients[3] * xx^2 + fit2$coefficients[4] * xx^3)
y3=cbind(xx, fit3$coefficients[1] + fit3$coefficients[2] * xx 
         + fit3$coefficients[3] * xx^2 + fit3$coefficients[4] * xx^3)
y4=cbind(xx, fit4$coefficients[1] + fit4$coefficients[2] * xx 
         + fit4$coefficients[3] * xx^2 + fit4$coefficients[4] * xx^3)
y5=cbind(xx, fit5$coefficients[1] + fit5$coefficients[2] * xx 
         + fit5$coefficients[3] * xx^2 + fit5$coefficients[4] * xx^3)
y6=cbind(xx, fit6$coefficients[1] + fit6$coefficients[2] * xx 
         + fit6$coefficients[3] * xx^2 + fit6$coefficients[4] * xx^3)
#quantile regression plot
plot(Age, InPeriod, col = 'grey90', cex = 0.8, ylab = "Incubation period")
lines(y1, ylim = c(0, 25), ylab = 'Incubation period',
      xlab = 'Age', type = "l",lwd = 2, col = "blue")
lines(y2, ylim = c(0, 25), ylab = 'Incubation period',
      xlab = 'Age', type = "l",lwd = 2, col = "orange")
lines(y3, ylim = c(0, 25), ylab = 'Incubation period',
      xlab = 'Age', type = "l",lwd = 2, col = "red")
lines(y4, ylim = c(0, 25), ylab = 'Incubation period',
      xlab = 'Age', type = "l",lwd = 2, col = "orange")
lines(y6, ylim = c(0, 25), ylab = 'Incubation period',
      xlab = 'Age', type = "l",lwd = 2, col = "darkgreen")
lines(y5, ylim = c(0, 25), ylab = 'Incubation period',
      xlab = 'Age', type = "l",lwd = 2, col = "blue")
abline(h = 15.05, col = "SlateGrey", lty = 2, lwd = 2)
text(33, 16, 15.05, col = "SlateGrey")
text(88, 1.5, 0.05, col = "blue")
text(88, 5.5, 0.25, col = "orange")
text(88, 10,  0.50, col = "red")
text(88, 15, 0.75, col = "orange")
text(88, 19, 0.90, col = "darkgreen")
text(88, 22, 0.95, col = "blue")
